# Supplementary material for: Correlated cryo-SEM and CryoNanoSIMS imaging of biological tissue
Source: PubMed Central journal article supplement (PMC10246362; doi:10.1186/s12915-023-01623-0), 2023-06-07
Supplement: 12915_2023_1623_MOESM1_ESM.pdf [file 12915_2023_1623_MOESM1_ESM.pdf]

# Supplementary Materials for

## Correlated Cryo-SEM and CryoNanoSIMS Imaging of Biological Tissue

Anders Meibom\*, Florent Plane, Tian Cheng, Gilles Grandjean, Olivier Haldimann, Stephane Escrig, Louise Jensen, Jean Daraspe, Antonio Mucciolo, Damien De Bellis, Nils Rådecker, Cristina Martin-Olmos, Christel Genoud, and Arnaud Comment.

\*Corresponding author. Email: [anders.meibom@epfl.ch](mailto:anders.meibom@epfl.ch)

### **This file includes:**

**Fig. S1:** 3D renderings comparing conventional and CryoNanoSIMS transfer systems

**Fig. S2:** Cooling curve for the CryoNanoSIMS

**Fig. S3:** Schematic drawing illustrating ultramicrotome cryo-planing

**Fig. S4:** CryoNanoSIMS analysis of carbon isotope ratios in Green Hydra

**Fig. S5:** CryoNanoSIMS analysis of nitrogen isotope ratios in Green Hydra

**Fig. S6:** SEM images of sample surfaces before and after (Cryo-)NanoSIMS imaging

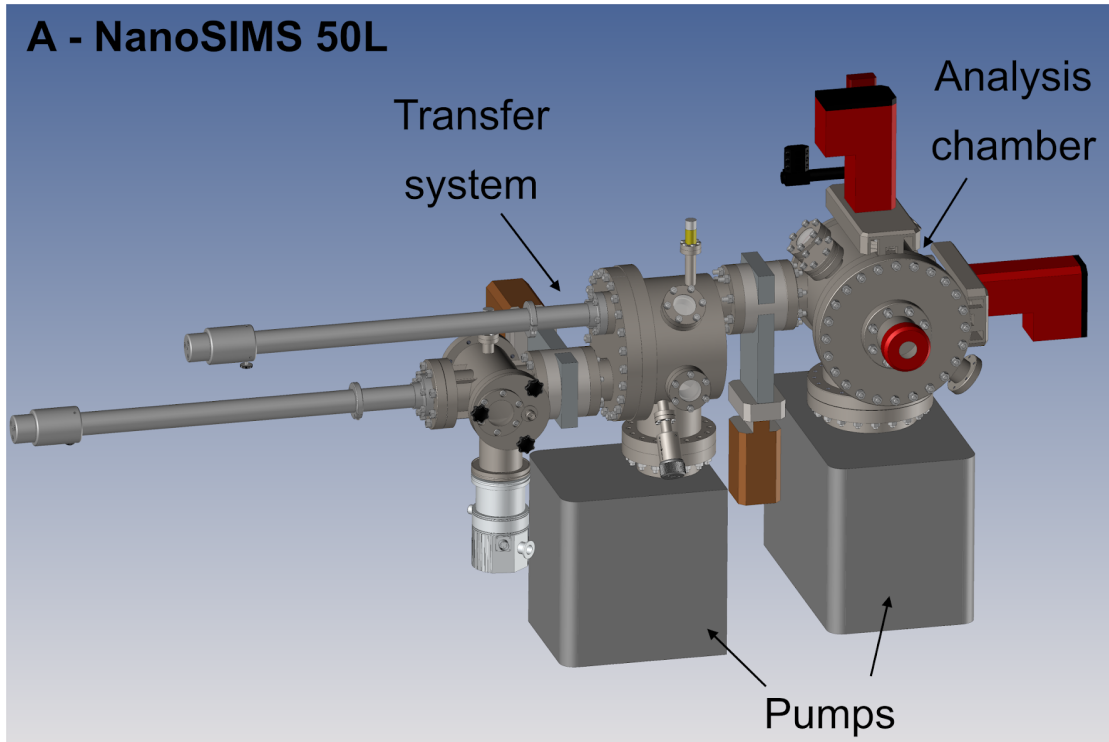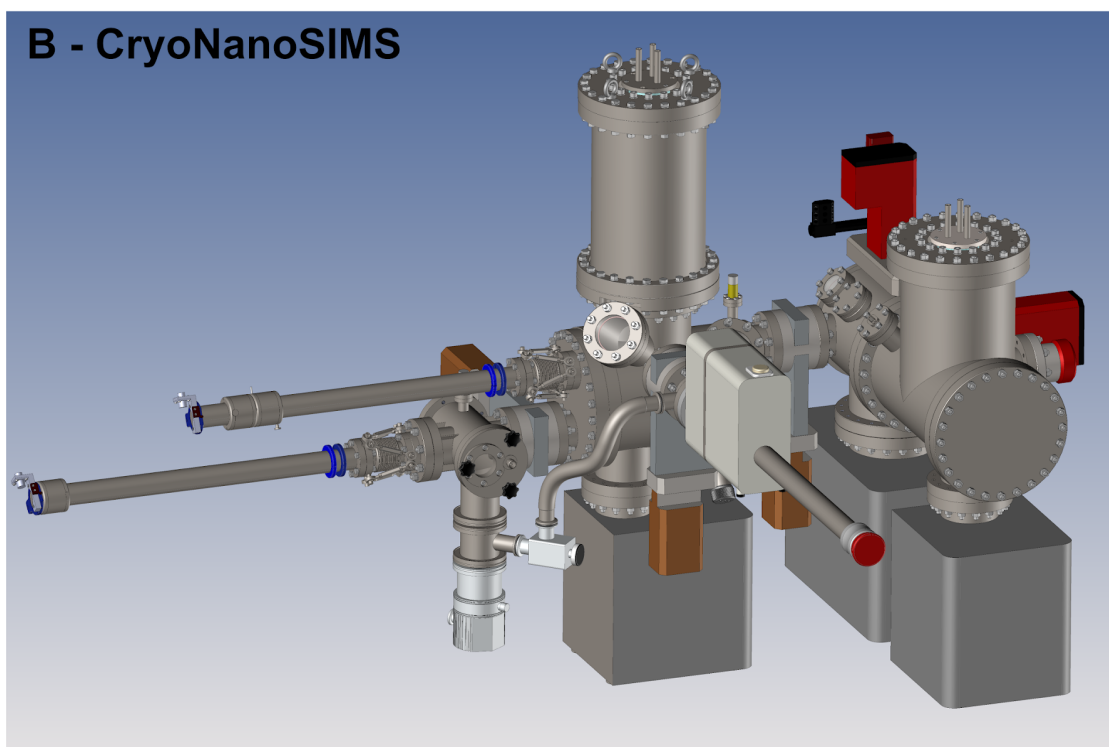

**Figure S1.** 3D renderings comparing the transfer system and analysis chamber of the conventional NanoSIMS instrument (A) with those of the CryoNanoSIMS (B).

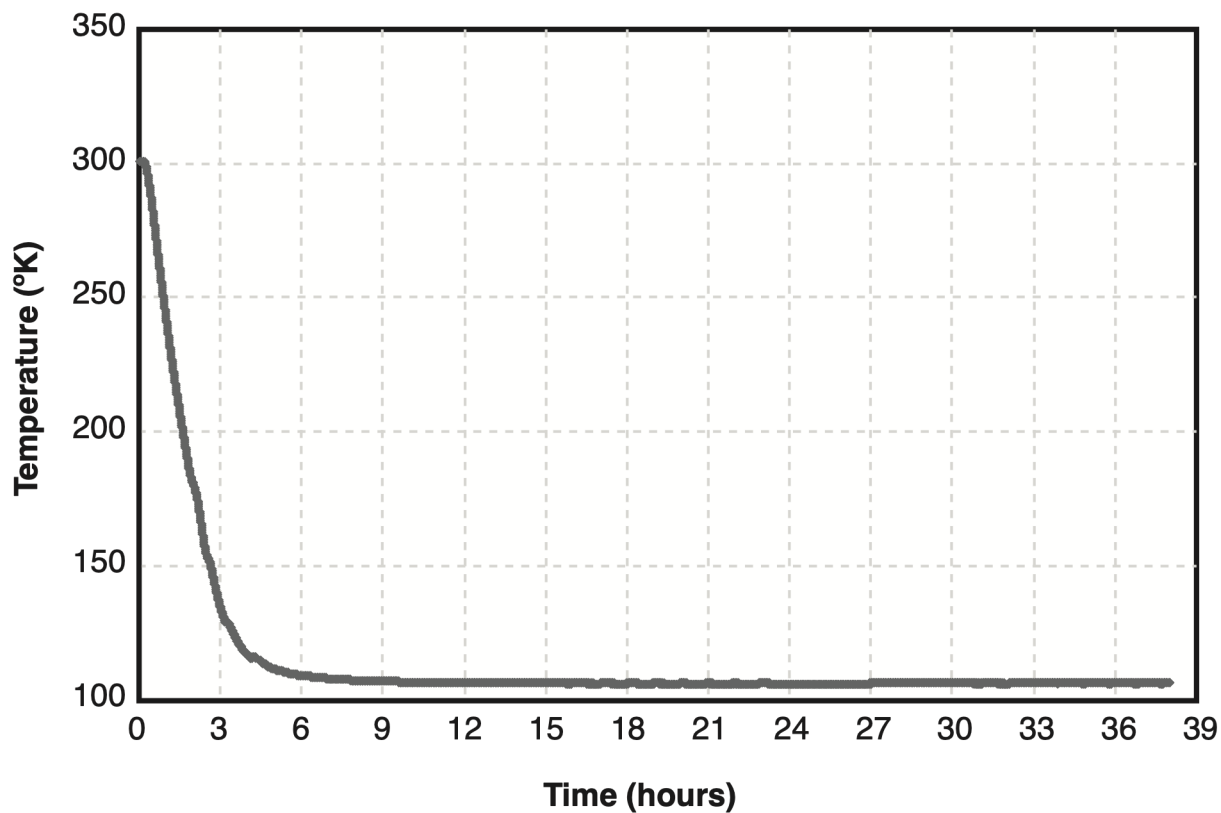

**Figure S2. Cooling curve for the CryoNanoSIMS.** The temperature is measured with a thermocouple on the sample stage a few mm from the sample itself. Starting at room temperature, a stable temperature of 106.2 K is reached in about 10 hours, after which the temperature variation is within  $\pm 0.1$  K (1 standard deviation) for as long as liquid N<sub>2</sub> is supplied to the instrument.

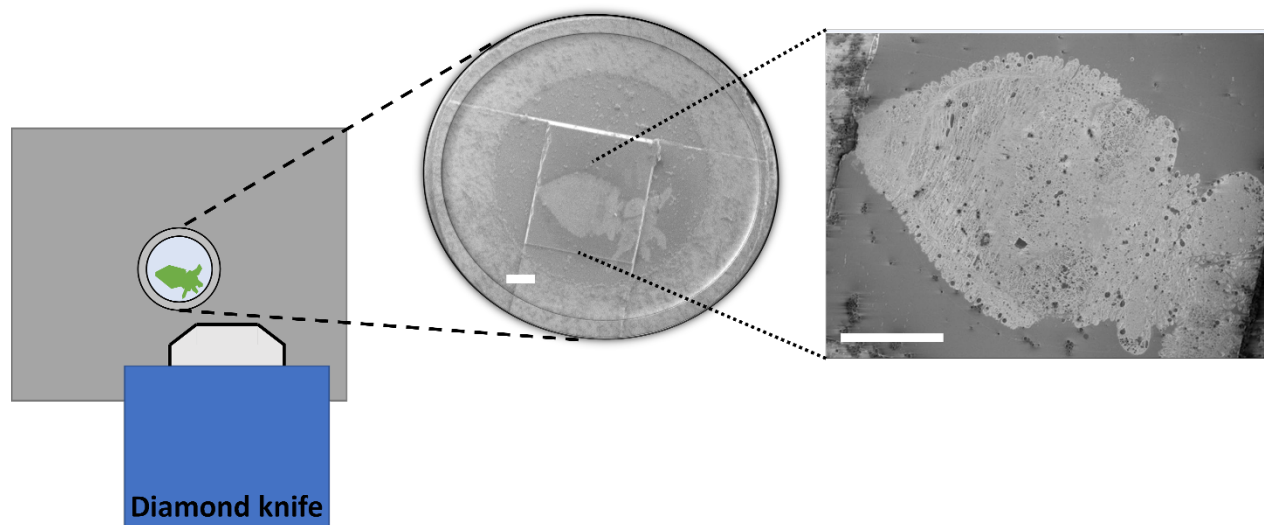

**Figure S3. Schematic drawing illustrating ultramicrotome cryo-planing.** The diamond knife trims and planarizes the sample (left) creating a rectangular pyramid with a very flat block-face surface as shown in the cryo-SEM image (middle). Right: Cryo-SEM micrograph of a Green Hydra sample. Scale bars are 250  $\mu\text{m}$ .

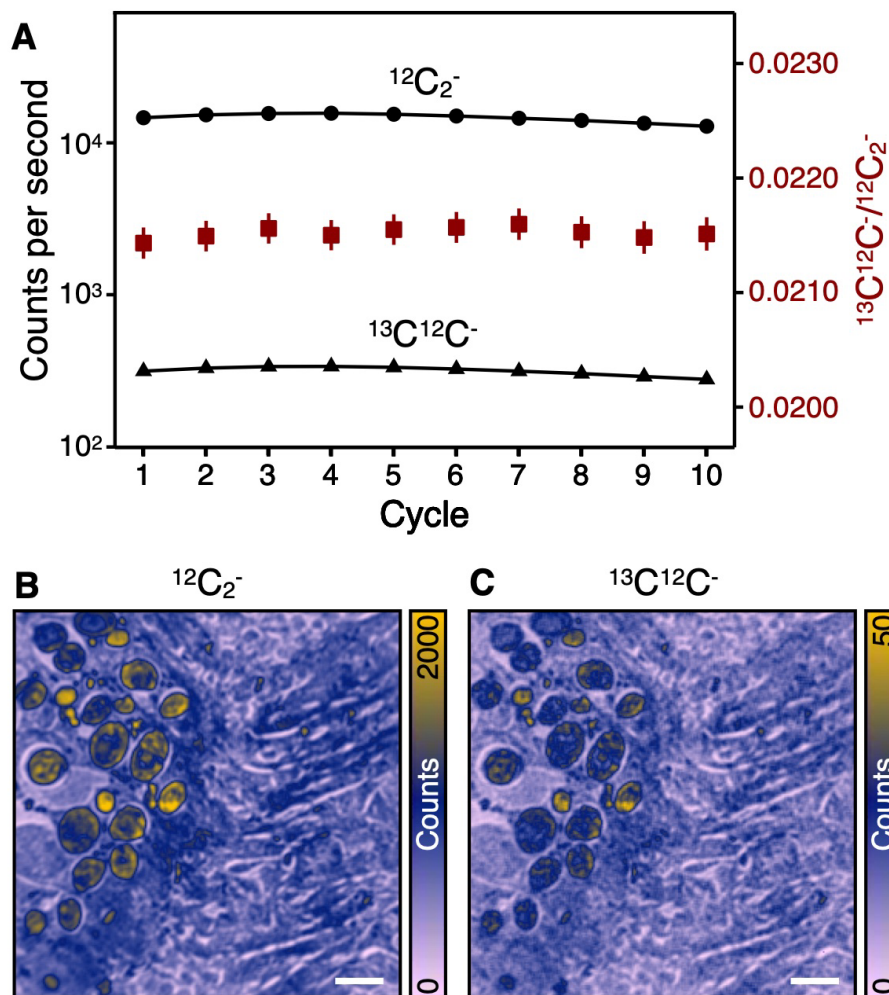

**Figure S4. CryoNanoSIMS analysis of carbon isotope ratios in Green Hydra:** count rates, isotope ratio, and ion images obtained from analysis of isotopically normal tissue of Green Hydra. **(A)** Average  $^{12}\text{C}_2^-$  and  $^{13}\text{C}^{12}\text{C}^-$  ion count rates and corresponding isotope ratio over 10 imaging cycles for the entire image. Each cycle consisted of a 256x256 pixel raster with a beam dwelling time of 5 milliseconds, for a total imaging time of ca. 60 minutes. Isotope ratio error bars are  $\pm 2$  std error. **(B and C)** Drift-corrected and accumulated ion-maps for  $^{12}\text{C}_2^-$  and  $^{13}\text{C}^{12}\text{C}^-$ , respectively. Scale bars are 5  $\mu\text{m}$ .

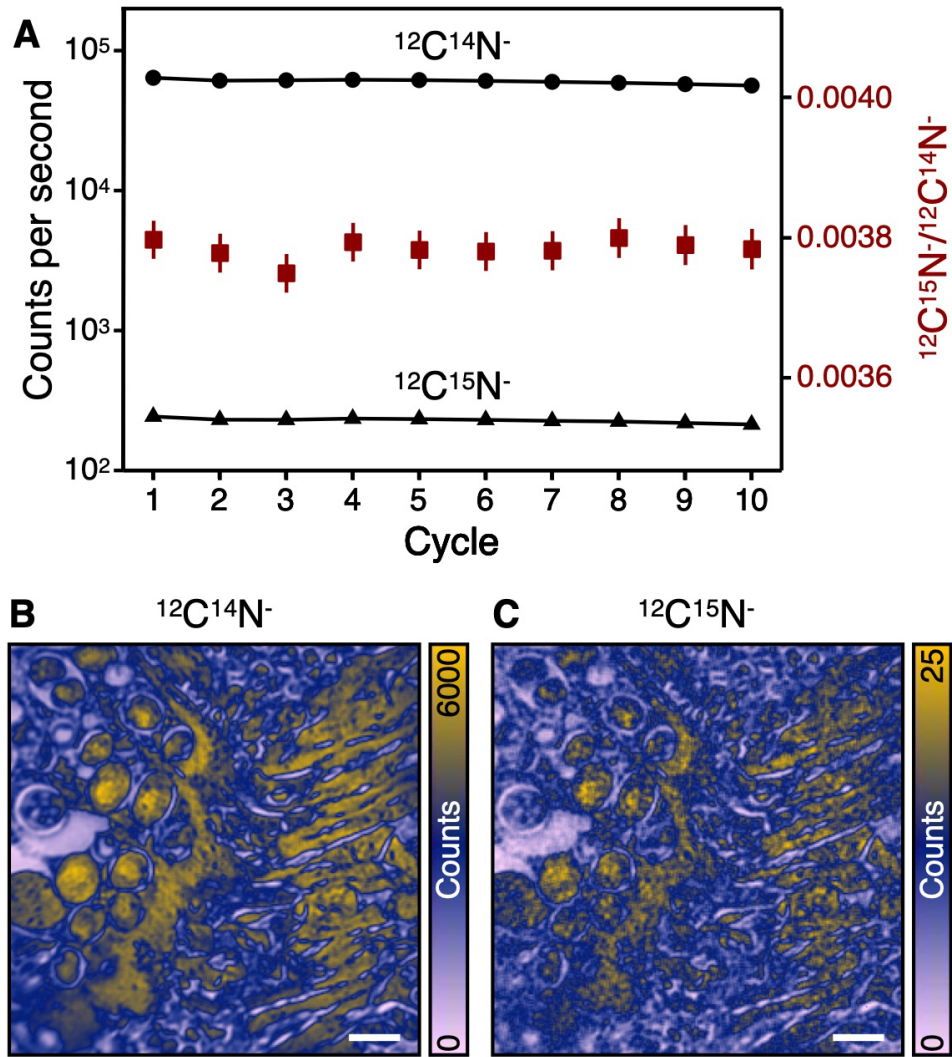

**Figure S5. CryoNanoSIMS analysis of nitrogen isotope ratios in Green Hydra:** count rates, isotope ratio, and ion images obtained from analysis of isotopically normal tissue of Green Hydra. (A) Average  $^{12}\text{C}^{14}\text{N}^-$  and  $^{12}\text{C}^{15}\text{N}^-$  ion count rates and corresponding isotope ratio over 10 imaging cycles for the entire image. Each cycle consisted of a 256x256 pixel raster with a beam dwelling time of 5 milliseconds, for a total imaging time of ca. 60 minutes. Isotope ratio error bars are  $\pm 2$  std error. (B and C) Drift-corrected and accumulated ion-maps for  $^{12}\text{C}^{14}\text{N}^-$  and  $^{12}\text{C}^{15}\text{N}^-$ , respectively. Scale bars are 5  $\mu\text{m}$ .

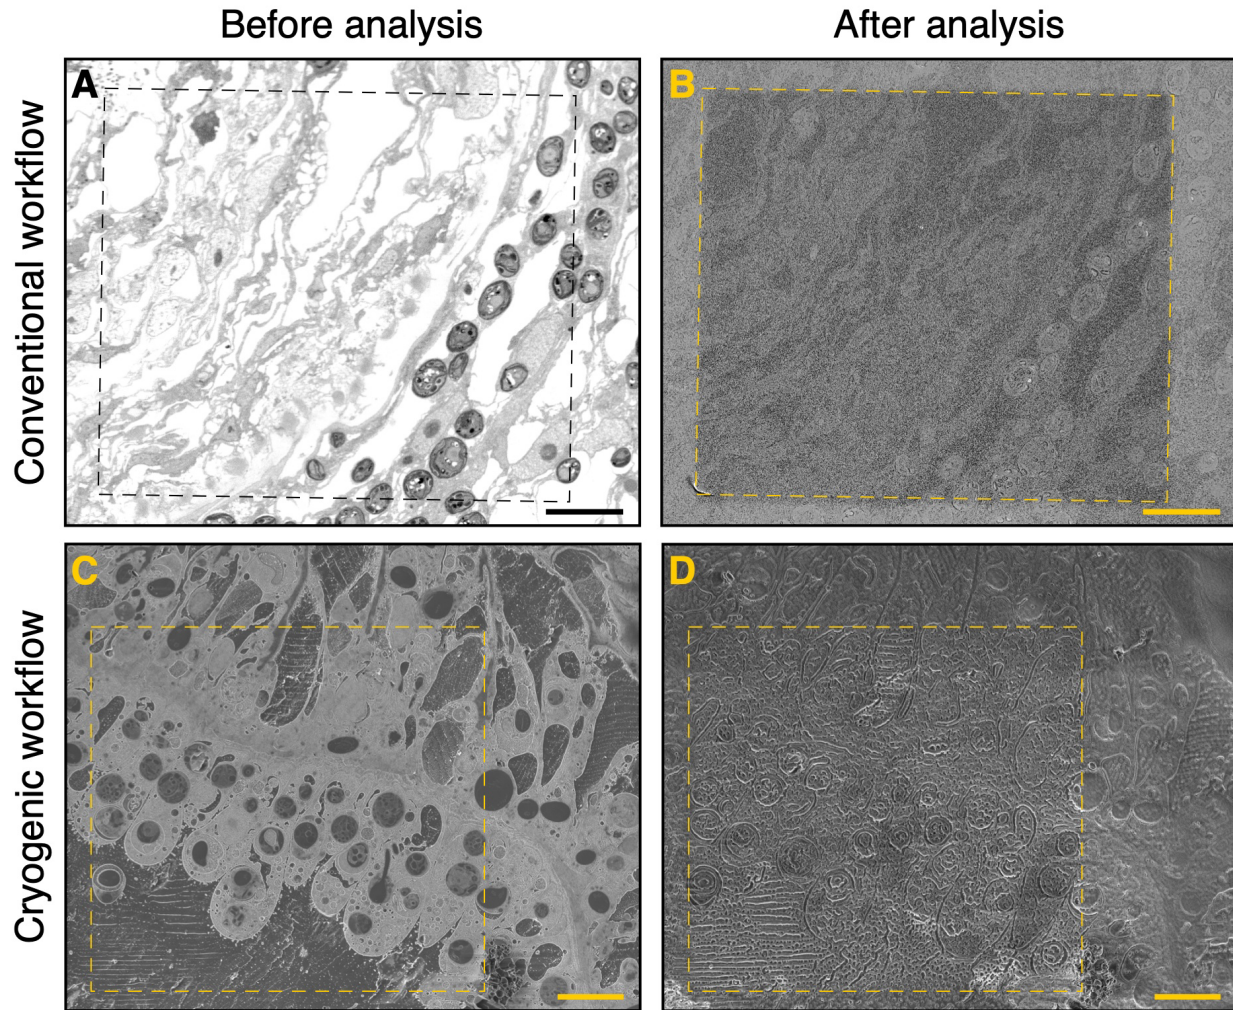

**Figure S6. Sample surface before and after NanoSIMS imaging.** SEM images of sample surfaces before and after NanoSIMS analysis with conventional (**A** and **B**) and cryogenic (**C** and **D**) workflows, respectively. Squares indicate the areas of NanoSIMS analysis. In **A** and **C** the sample surfaces were coated with about 3 nm metal, whereas in **B** and **D** the surface was coated with about 20 nm metal, except for the areas of NanoSIMS imaging, where this coating had been removed by pre-sputtering. Scale bars are 10  $\mu\text{m}$ .
